# Supplementary material for: Overexpression of Lipocalin-2 Inhibits Proliferation and Invasiveness of Human Glioblastoma Multiforme Cells by Activating ERK Targeting Cathepsin D Expression
Source: MDPI journal article supplement (doi:10.3390/biology10050390), 2021-05-01
Supplement: s1 [file s1]

## Supplementary Figure 1

|          |                                                                               | U-251 |      | GBM8901 |      |
|----------|-------------------------------------------------------------------------------|-------|------|---------|------|
|          |                                                                               | Neo   | LCN2 | Neo     | LCN2 |
| A5, A6   | ADAM9 8754 Ectodomain MDC9, meltrin g                                         | 1.00  | 0.99 | 1.00    | 1.12 |
| A7, A8   | ADAMTS1 9510 Proform METH1                                                    | 1.00  | 0.95 | 1.00    | 1.11 |
| A9, A10  | ADAMTS13 11093 Active von Willebrand factor-cleaving protease                 | 1.00  | 0.64 | 1.00    | 0.90 |
| A11, A12 | Cathepsin A 5476 Proform & Active CTSA, Lysosomal Carboxypeptidase A          | 1.00  | 0.94 | 1.00    | 0.94 |
| A13, A14 | Cathepsin B 1508 Proform CTSB, APPS, CPSB                                     | 1.00  | 1.45 | 1.00    | 0.63 |
| A15, A16 | Cathepsin C 1075 Proform & Active CTSC                                        | 1.00  | 1.43 | 1.00    | 0.95 |
| A17, A18 | Cathepsin D 1509 Proform & Active CTSD, CPSD                                  | 1.00  | 0.59 | 1.00    | 0.51 |
| A19, A20 | Reference Spots N/A N/A RS                                                    | 1.00  | 1.02 | 1.00    | 1.00 |
| B5, B6   | Cathepsin L 1514 Proform & Active CTSL, CATL, MEP, Cathepsin L1               | 1.00  | 0.98 | 1.00    | 1.42 |
| B7, B8   | Cathepsin S 1520 Proform & Active CTSS                                        | 1.00  | 1.22 | 1.00    | 0.90 |
| B9, B10  | Cathepsin V 1515 Proform & Active CTSV, CTSL2, CTSU, Cathepsin L2             | 1.00  | 1.12 | 1.00    | 0.91 |
| B11, B12 | Cathepsin X/Z/P 1522 Proform & Active CTSX, CTSZ                              | 1.00  | 1.21 | 1.00    | 1.06 |
| B13, B14 | DPPIV/CD26 1803 Ectodomain ADABP, ADCP2                                       | 1.00  | 1.24 | 1.00    | 1.03 |
| B17, B18 | Kallikrein 5 25818 Proform & Active KLK5, SCTE, KLKL2                         | 1.00  | 1.41 | 1.00    | 1.22 |
| C7, C8   | Kallikrein 10 5655 Proform & Active KLK10, NES1, PRSSL1                       | 1.00  | 0.67 | 1.00    | 1.62 |
| C11, C12 | Kallikrein 13 26085 Proform & Active KLK13, KLKL4                             | 1.00  | 1.30 | 1.00    | 0.93 |
| C13, C14 | MMP-1 4312 Proform & Active Collagenase 1, Interstitial Collagenase           | 1.00  | 1.88 | 1.00    | 0.97 |
| C15, C16 | MMP-2 4313 Proform & Active Gelatinase A                                      | 1.00  | 1.01 | 1.00    | 0.96 |
| C17, C18 | MMP-3 4314 Proform & Active Stromelysin-1                                     | 1.00  | 1.45 | 1.00    | 0.95 |
| D3, D4   | MMP-7 4316 Proform & Active Matrilysin, PUMP 1                                | 1.00  | 1.09 | 1.00    | 1.33 |
| D5, D6   | MMP-8 4317 Proform & Active Collagenase 2, Neutrophil Collagenase             | 1.00  | 1.21 | 1.00    | 1.29 |
| D7, D8   | MMP-9 4318 Proform & Active Gelatinase B, CLG4B, GELB                         | 1.00  | 1.04 | 1.00    | 1.55 |
| D9, D10  | MMP-10 4319 Proform & Active Stromelysin-2                                    | 1.00  | 0.87 | 1.00    | 1.34 |
| D11, D12 | MMP-12 4321 Proform & Active Macrophage Elastase                              | 1.00  | 1.56 | 1.00    | 0.82 |
| D13, D14 | MMP-13 4322 Proform Collagenase 3                                             | 1.00  | 0.96 | 1.00    | 0.79 |
| D15, D16 | Nepilysin/CD10 4311 Ectodomain MME, NEP, CALLA                                | 1.00  | 1.54 | 1.00    | 0.87 |
| D17, D18 | Presenilin 5663 N-Terminal Fragment PSEN1, AD3, PS-1                          | 1.00  | 1.29 | 1.00    | 0.86 |
| E1, E2   | Reference Spots N/A N/A RS                                                    | 1.00  | 1.09 | 1.00    | 1.05 |
| E7, E8   | uPA/Urokinase 5328 Proform & Active Urokinase-type Plasminogen Activator, PLA | 1.00  | 1.06 | 1.00    | 1.21 |

**Supplementary Figure S1:** The list of quantified these protein expressions in Neo-overexpressed or LCN2-GBM8901 and U-251 cells by human protease array profile.
