# Supplementary figures and images for: Overexpression of Lipocalin-2 Inhibits Proliferation and Invasiveness of Human Glioblastoma Multiforme Cells by Activating ERK Targeting Cathepsin D Expression
Source: MDPI journal article supplement (doi:10.3390/biology10050390), 2021-05-01

**Figure-1C**

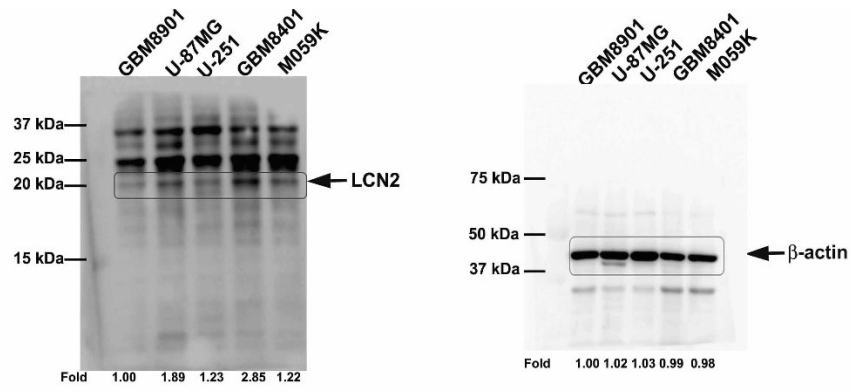

**Figure-1E**

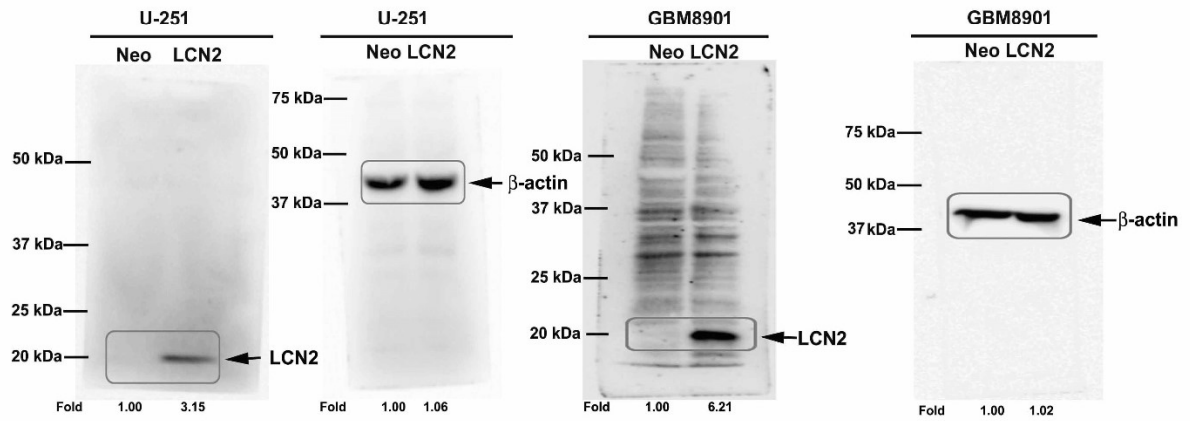

Figure-4B

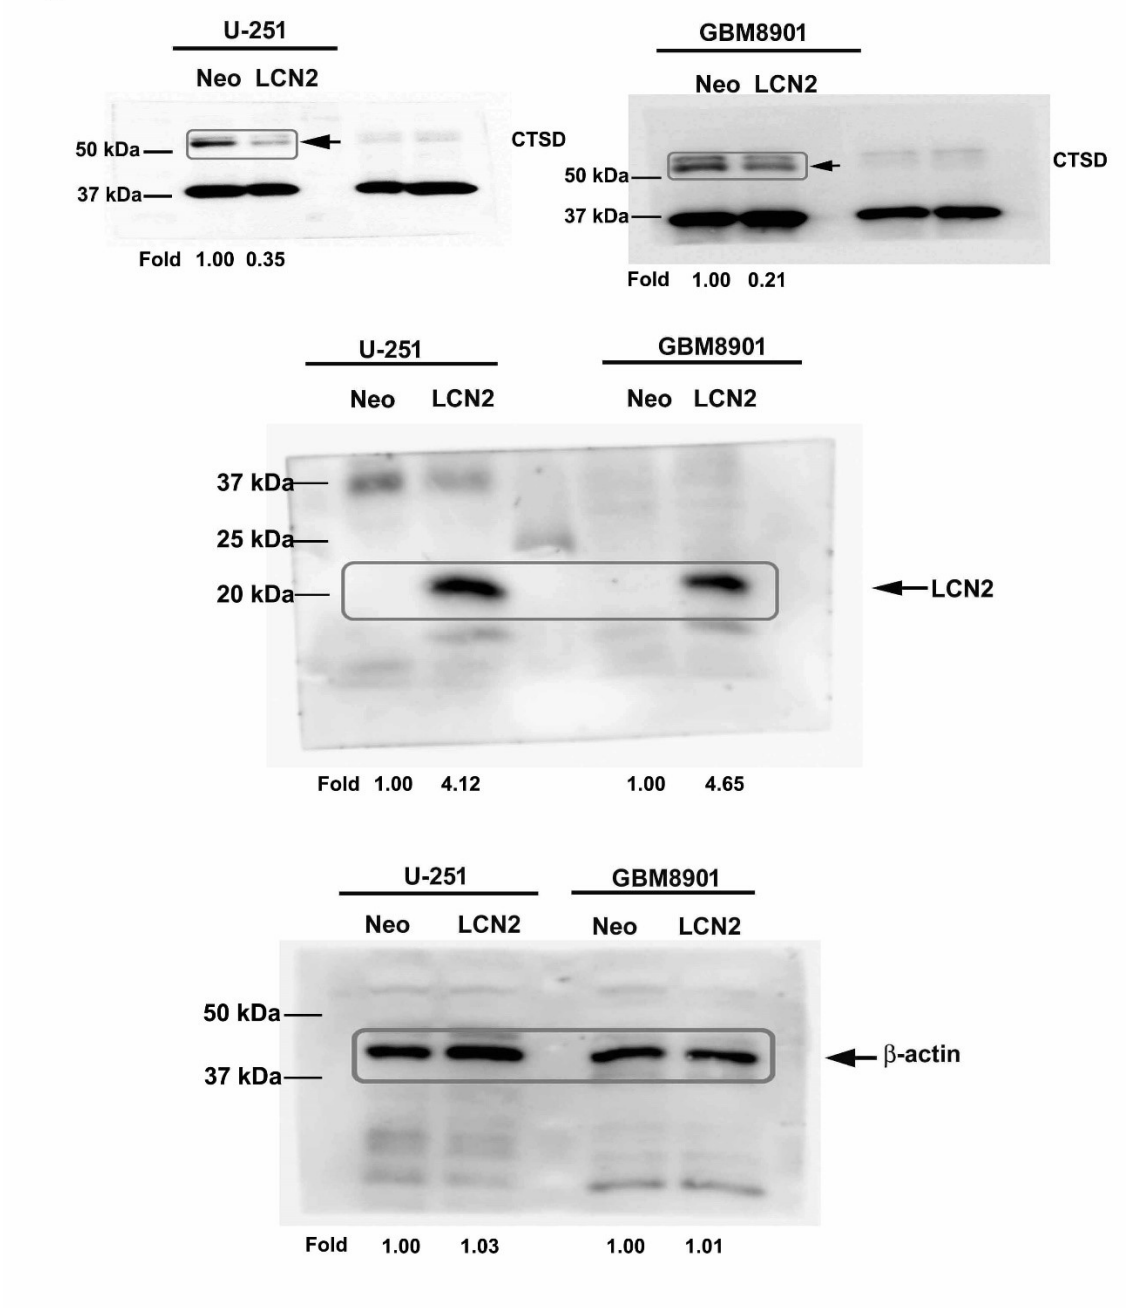

Figure-5A

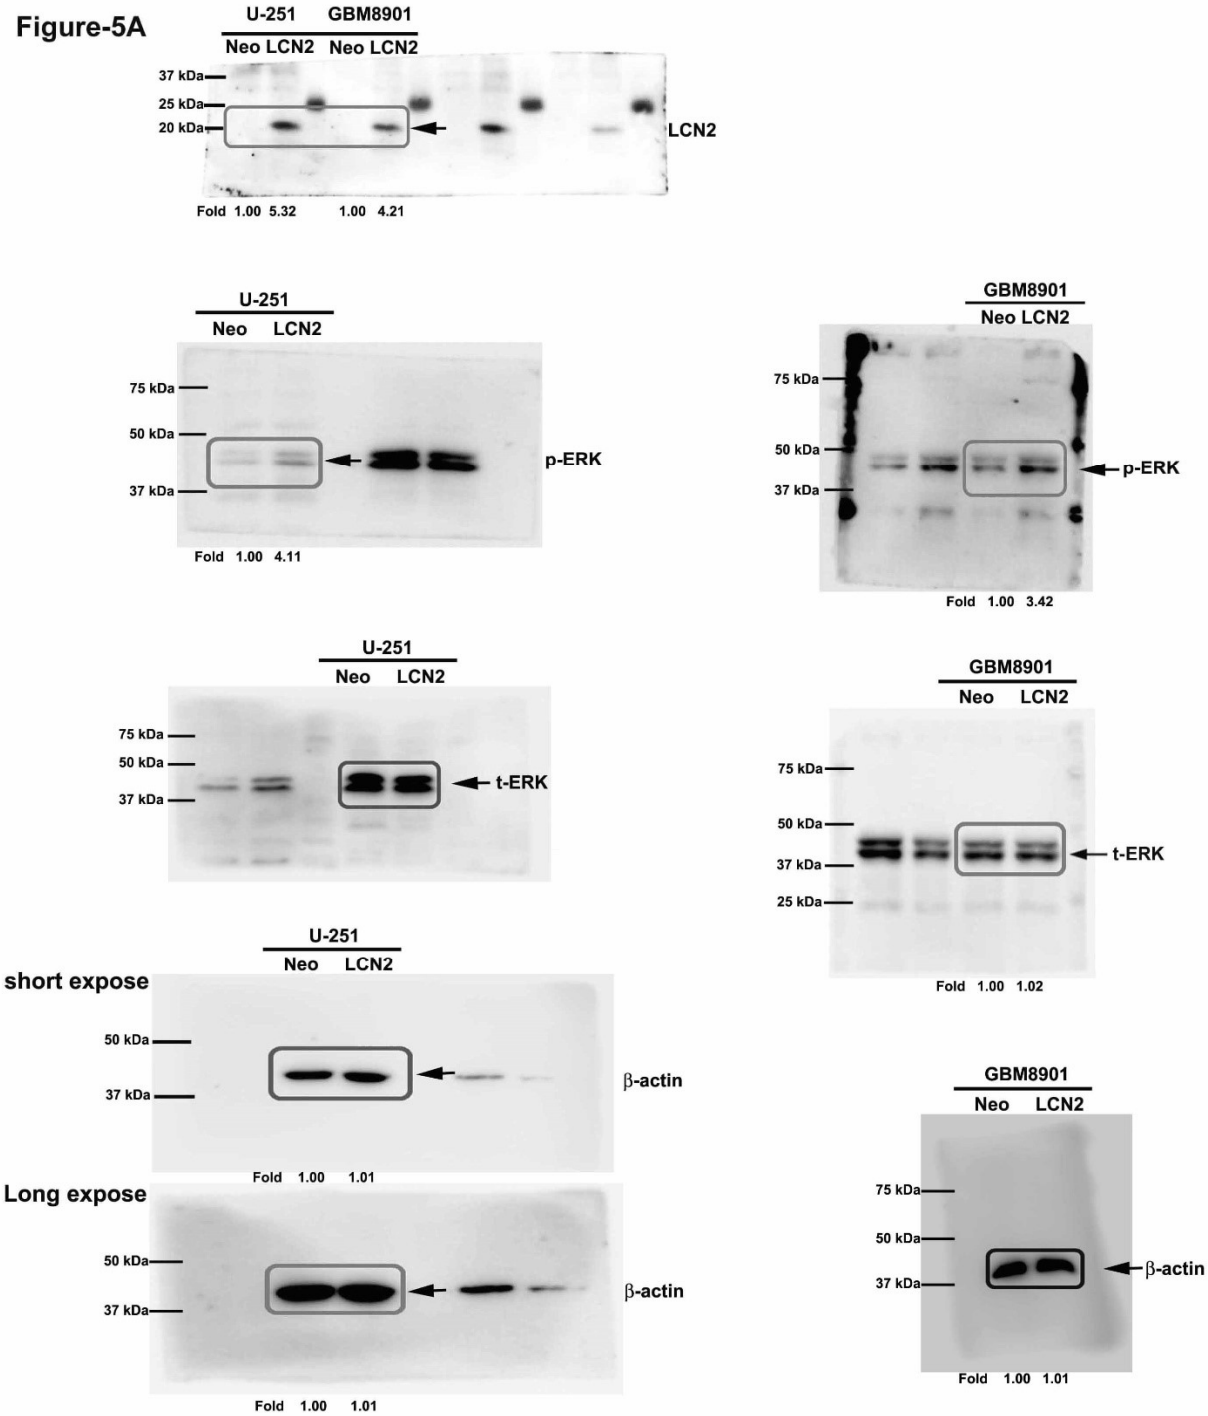

Figure-5B

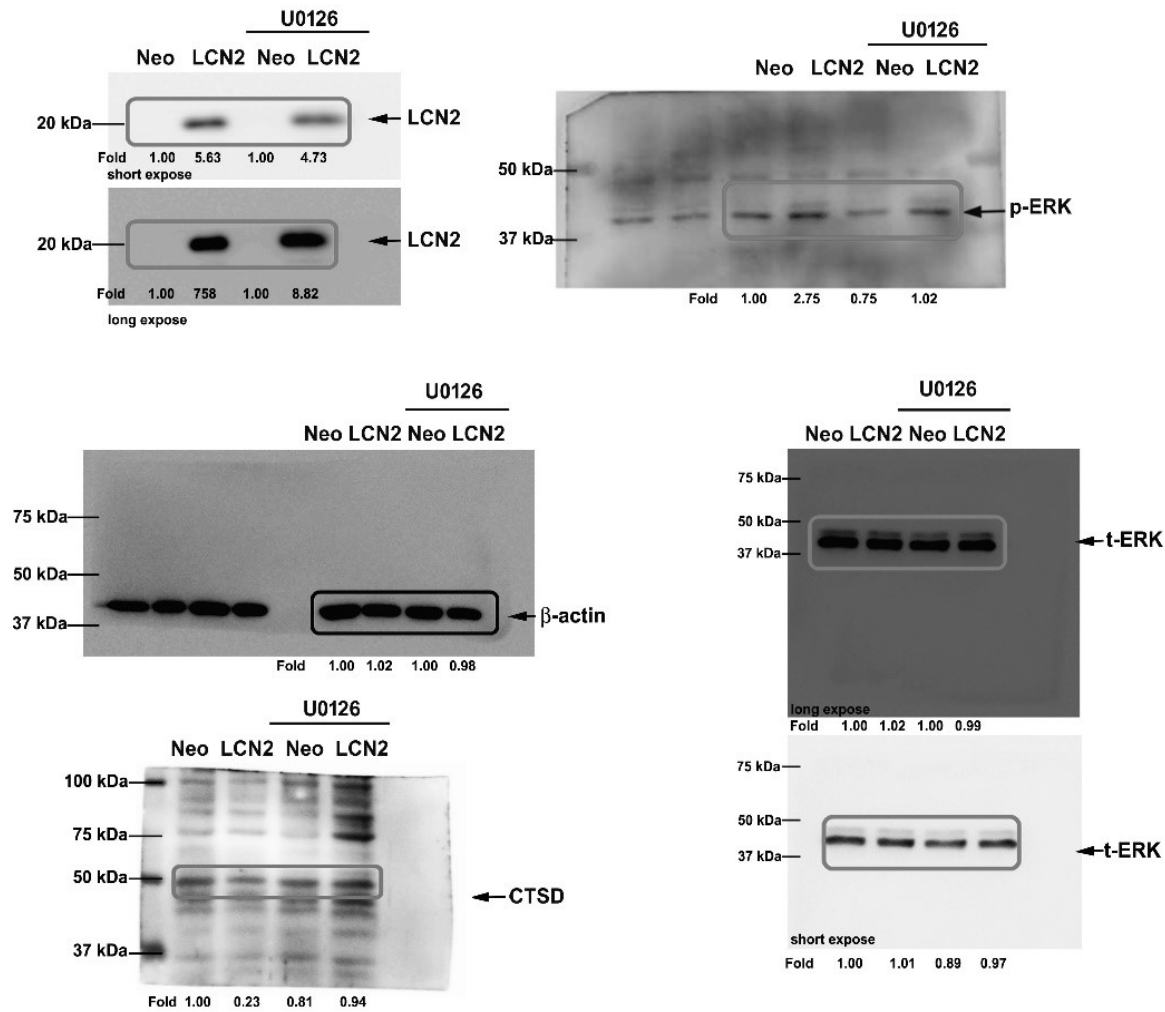

**Figure-5D**

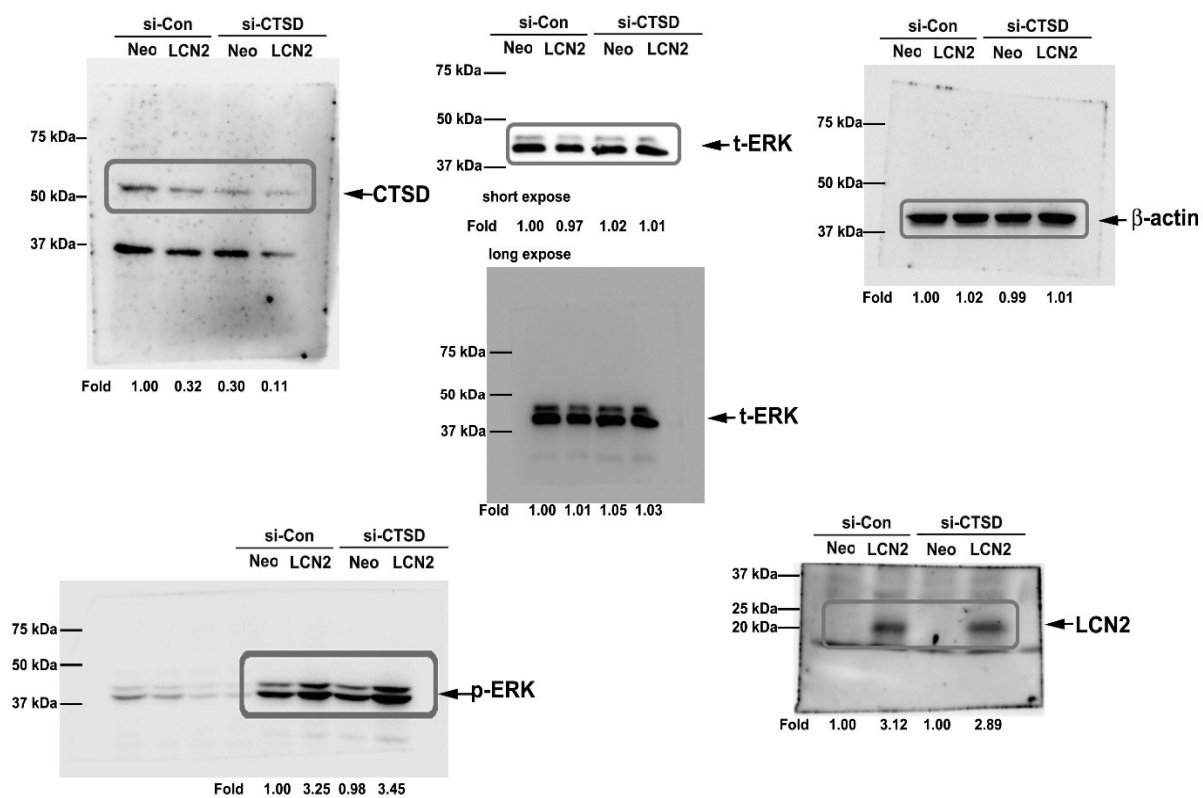

Supplement: s1 [file s1]
